# Supplementary material for: An Immune Checkpoint-Related Gene Signature for Predicting Survival of Pediatric Acute Myeloid Leukemia
Source: Hindawi journal article supplement (doi:10.1155/2021/5550116), 2021-04-19
Supplement: f1 [file 5550116.f1.zip]

A circular network diagram showing interactions between 100 proteins. The proteins are arranged in a circle, and their interactions are represented by a dense web of blue lines connecting them. The proteins are labeled with names like AKT1, MAPK1, and others.

A word cloud of gene symbols. The symbols are arranged in a dense, overlapping manner. The colors of the symbols vary, including shades of blue, green, yellow, orange, red, and purple. The symbols are of various sizes, with some being significantly larger than others. The symbols include: MAPK14, STAT3, CD86, CSNK2A1, FOS, CDC42, MAPK3, CD28, PTEN, MAPK1, MYB, LCK, EGF, AKT2, HRAS, LYN, NFkBIE, KRAS, NFATC3, PAK3, MLST8, AKT3, JUN, LAT, AKT1, PIK3CA, CSK, SRC, PTPN11, PRR5, CTLA4, CD4, ALK, RAC1, EGFR, FYN, MTOR, TLR4, TNFRSF14, CHUK, PAK1, TLR2, IFNG, ICOS, HLA-DRA, NFKBIB, CSNK2B, IFNGR1, EML4, CSNK2A2, and BATF.
